# Supplementary material for: Seroprevalence of antibodies to dengue and chikungunya viruses in Thailand
Source: PubMed Central journal article supplement (PMC5491253; doi:10.1371/journal.pone.0180560), 2017-06-29
Supplement: pone.0180560.s002.pdf [file pone.0180560.s002.pdf]

| code   | M/F | age | OD    |
|--------|-----|-----|-------|
| ST0327 | M   | 1   | 0.166 |
| ST0194 | M   | 2   | 0.228 |
| ST0019 | M   | 3   | 0.131 |
| ST0278 | F   | 4   | 0.108 |
| ST0279 | F   | 6   | 2.278 |
| ST0280 | F   | 8   | 0.268 |
| ST0491 | M   | 4   | 0.064 |
| ST0492 | F   | 5   | 0.127 |
| ST0439 | F   | 9   | 1.902 |
| ST0563 | F   | 9   | 0.179 |
| ST705  | M   | 3   | 0.114 |
| ST688  | M   | 1   | 0.154 |
| ST679  | M   | 1   | 0.077 |
| ST666  | F   | 6   | 0.069 |
| ST682  | M   | 5   | 0.136 |
| ST709  | M   | 0   | 0.063 |
| ST703  | M   | 1   | 0.112 |
| ST702  | M   | 7   | 0.078 |
| ST667  | F   | 0   | 0.107 |
| ST681  | F   | 2   | 0.606 |
| ST668  | F   | 2   | 0.085 |
| ST665  | M   | 3   | 0.061 |
| ST712  | M   | 4   | 0.099 |
| ST675  | F   | 9   | 0.064 |
| ST683  | F   | 3   | 0.138 |
| ST707  | F   | 2   | 0.106 |
| ST671  | F   | 3   | 0.101 |
| ST695  | F   | 3   | 0.089 |
| ST692  | M   | 0   | 0.095 |
| ST684  | F   | 1   | 0.161 |
| ST677  | F   | 4   | 0.105 |
| ST696  | M   | 3   | 0.085 |
| ST669  | F   | 2   | 0.066 |
| ST680  | F   | 2   | 0.127 |

| code   | M/F | age | OD    |
|--------|-----|-----|-------|
| ST0298 | F   | 10  | 0.219 |
| ST0411 | F   | 18  | 0.126 |
| ST0404 | F   | 19  | 0.123 |
| ST0015 | F   | 19  | 0.248 |
| ST0024 | M   | 10  | 0.133 |
| ST0264 | M   | 14  | 0.133 |
| ST0268 | M   | 14  | 0.124 |
| ST0289 | M   | 14  | 1.694 |
| ST0025 | M   | 12  | 0.177 |
| ST0048 | M   | 19  | 0.135 |
| ST0193 | M   | 19  | 1.399 |
| ST0507 | M   | 18  | 0.106 |
| ST0508 | F   | 18  | 1.571 |
| ST0509 | F   | 18  | 0.269 |
| ST0523 | F   | 17  | 0.175 |
| ST0524 | F   | 17  | 0.113 |
| ST0525 | F   | 19  | 0.098 |
| ST0526 | F   | 19  | 0.296 |
| ST0546 | F   | 19  | 0.113 |
| ST0553 | F   | 19  | 0.2   |
| ST0578 | M   | 15  | 0.191 |
| ST678  | F   | 10  | 0.093 |
| ST689  | F   | 11  | 0.095 |
| ST690  | F   | 13  | 0.06  |
| ST706  | M   | 11  | 0.126 |
| ST708  | M   | 13  | 0.059 |
| ST713  | M   | 12  | 0.092 |

| code   | M/F | age | OD    |
|--------|-----|-----|-------|
| ST0272 | F   | 20  | 0.192 |
| ST0029 | F   | 21  | 2.196 |
| ST0033 | F   | 21  | 0.111 |
| ST0020 | F   | 24  | 0.274 |
| ST0208 | F   | 24  | 0.174 |
| ST0040 | F   | 25  | 0.164 |
| ST0124 | F   | 25  | 0.113 |
| ST0140 | F   | 25  | 0.142 |
| ST0141 | F   | 25  | 0.136 |
| ST0218 | F   | 25  | 0.135 |
| ST0206 | F   | 26  | 1.408 |
| ST0211 | F   | 26  | 2.046 |
| ST0424 | F   | 26  | 0.203 |
| ST0430 | F   | 26  | 0.175 |
| ST0021 | F   | 27  | 0.137 |
| ST0131 | F   | 28  | 0.225 |
| ST0207 | F   | 28  | 0.126 |
| ST0216 | F   | 28  | 0.165 |
| ST0126 | F   | 29  | 0.208 |
| ST0135 | F   | 29  | 0.133 |
| ST0221 | M   | 26  | 0.083 |
| ST0239 | M   | 26  | 0.132 |
| ST0306 | M   | 26  | 0.162 |
| ST0326 | M   | 26  | 0.149 |
| ST0362 | M   | 26  | 0.124 |
| ST0285 | M   | 27  | 0.089 |
| ST0235 | M   | 28  | 0.116 |
| ST0331 | M   | 28  | 0.096 |
| ST0367 | M   | 28  | 0.117 |
| ST0371 | M   | 28  | 0.112 |
| ST0049 | M   | 21  | 0.165 |
| ST0348 | M   | 21  | 0.161 |
| ST0253 | M   | 24  | 0.137 |
| ST0204 | M   | 25  | 0.113 |
| ST0309 | M   | 25  | 0.264 |
| ST0393 | M   | 25  | 0.106 |
| ST0277 | M   | 26  | 0.143 |
| ST0284 | M   | 26  | 0.323 |

| code   | M/F | age | OD    |
|--------|-----|-----|-------|
| ST0014 | F   | 31  | 0.119 |
| ST0159 | F   | 31  | 0.13  |
| ST0246 | F   | 32  | 0.08  |
| ST0247 | F   | 32  | 0.363 |
| ST0359 | F   | 33  | 0.101 |
| ST0360 | F   | 33  | 0.131 |
| ST0315 | F   | 34  | 0.374 |
| ST0397 | F   | 34  | 0.134 |
| ST0421 | F   | 35  | 0.1   |
| ST0125 | F   | 36  | 0.222 |
| ST0304 | F   | 37  | 0.079 |
| ST0313 | F   | 37  | 0.167 |
| ST0138 | F   | 39  | 0.171 |
| ST0224 | F   | 39  | 0.214 |
| ST0433 | F   | 30  | 0.129 |
| ST0422 | F   | 33  | 0.329 |
| ST0363 | M   | 30  | 0.129 |
| ST0399 | M   | 30  | 1.897 |
| ST0283 | M   | 33  | 0.127 |
| ST0034 | M   | 34  | 0.086 |
| ST0243 | M   | 34  | 0.866 |
| ST0254 | M   | 34  | 0.15  |
| ST0023 | M   | 35  | 0.099 |
| ST0400 | M   | 36  | 0.229 |
| ST0409 | M   | 36  | 0.098 |
| ST0002 | M   | 37  | 0.371 |
| ST0257 | M   | 37  | 0.169 |
| ST0353 | M   | 37  | 1.407 |
| ST0333 | M   | 38  | 1.112 |
| ST0249 | M   | 39  | 0.123 |
| ST0406 | M   | 39  | 0.186 |
| ST0506 | F   | 33  | 0.097 |
| ST0510 | M   | 39  | 0.212 |
| ST0560 | M   | 35  | 0.159 |
| ST0245 | F   | 31  | 0.269 |
| ST0290 | F   | 37  | 0.066 |

| code   | M/F | age | OD    |
|--------|-----|-----|-------|
| ST0310 | F   | 40  | 0.208 |
| ST0176 | F   | 41  | 1.143 |
| ST0220 | F   | 41  | 0.137 |
| ST0223 | F   | 42  | 1.561 |
| ST0428 | F   | 42  | 0.157 |
| ST0312 | F   | 45  | 0.127 |
| ST0378 | F   | 45  | 0.16  |
| ST0215 | F   | 46  | 1.193 |
| ST0320 | F   | 46  | 0.394 |
| ST0318 | F   | 48  | 0.784 |
| ST0347 | F   | 48  | 0.197 |
| ST0425 | F   | 49  | 1.137 |
| ST0432 | F   | 49  | 0.08  |
| ST0250 | M   | 40  | 0.957 |
| ST0382 | M   | 40  | 0.103 |
| ST0036 | M   | 41  | 1.245 |
| ST0256 | M   | 41  | 0.491 |
| ST0405 | M   | 41  | 0.115 |
| ST0037 | M   | 42  | 0.086 |
| ST0164 | M   | 45  | 0.842 |
| ST0394 | M   | 45  | 0.273 |
| ST0395 | M   | 47  | 1.817 |
| ST0303 | M   | 49  | 0.166 |
| ST0580 | F   | 49  | 0.15  |
| ST0500 | M   | 42  | 1.073 |
| ST0496 | F   | 45  | 0.568 |
| ST0437 | F   | 43  | 0.145 |
| ST0449 | F   | 41  | 1.069 |
| ST0490 | M   | 40  | 0.273 |
| ST0522 | M   | 40  | 0.317 |
| ST0511 | M   | 46  | 0.106 |
| ST0452 | M   | 43  | 0.597 |
| ST0434 | M   | 49  | 0.858 |
| ST0273 | F   | 43  | 0.267 |

| code   | M/F | age | OD    |
|--------|-----|-----|-------|
| ST0032 | F   | 51  | 0.103 |
| ST0162 | F   | 51  | 0.936 |
| ST0031 | F   | 53  | 0.963 |
| ST0058 | F   | 53  | 0.064 |
| ST0232 | F   | 55  | 0.406 |
| ST0314 | F   | 55  | 0.539 |
| ST0236 | F   | 56  | 0.233 |
| ST0060 | F   | 58  | 0.16  |
| ST0407 | F   | 58  | 0.146 |
| ST0372 | F   | 59  | 0.202 |
| ST0292 | F   | 60  | 0.208 |
| ST0412 | F   | 60  | 0.562 |
| ST0258 | M   | 50  | 0.157 |
| ST0375 | M   | 50  | 0.994 |
| ST0200 | M   | 51  | 0.697 |
| ST0139 | M   | 54  | 0.098 |
| ST0255 | M   | 54  | 1.381 |
| ST0351 | M   | 55  | 0.421 |
| ST0271 | M   | 56  | 0.083 |
| ST0061 | M   | 57  | 0.161 |
| ST0350 | M   | 57  | 0.471 |
| ST0055 | M   | 59  | 0.103 |
| ST0064 | M   | 59  | 0.289 |
| ST0260 | M   | 59  | 0.974 |
| ST0293 | M   | 59  | 1.189 |
| ST0323 | M   | 60  | 0.166 |
| ST0341 | M   | 60  | 0.545 |
| ST0426 | M   | 60  | 0.193 |
| ST0555 | M   | 53  | 0.191 |
| ST0517 | F   | 54  | 1.058 |
| ST0504 | F   | 53  | 0.155 |
| ST0443 | F   | 55  | 0.279 |
| ST0483 | F   | 56  | 1.103 |
| ST0472 | F   | 58  | 0.165 |
| ST0248 | F   | 59  | 0.181 |
| ST0260 | M   | 59  | 1.12  |
| ST0270 | F   | 59  | 0.628 |

| code   | M/F | age | OD    |
|--------|-----|-----|-------|
| ST0816 | F   | 1   | 0.148 |
| ST0820 | F   | 1   | 0.111 |
| ST1166 | F   | 1   | 0.115 |
| ST1280 | F   | 1   | 0.143 |
| ST0861 | F   | 3   | 0.179 |
| ST1236 | F   | 3   | 0.121 |
| ST1277 | F   | 3   | 0.071 |
| ST1289 | F   | 3   | 0.045 |
| ST1145 | F   | 4   | 0.255 |
| ST1203 | F   | 5   | 1.222 |
| ST1284 | F   | 6   | 1.988 |
| ST1186 | F   | 7   | 0.137 |
| ST1159 | F   | 8   | 1.932 |
| ST1248 | F   | 8   | 0.234 |
| ST1122 | F   | 9   | 0.178 |
| ST1129 | F   | 9   | 1.781 |
| ST0827 | M   | 1   | 0.185 |
| ST0899 | M   | 1   | 0.201 |
| ST1163 | M   | 1   | 0.124 |
| ST1294 | M   | 1   | 0.135 |
| ST1295 | M   | 1   | 0.293 |
| ST0843 | M   | 2   | 0.174 |
| ST1164 | M   | 2   | 0.207 |
| ST1197 | M   | 2   | 0.113 |
| ST1282 | M   | 2   | 0.061 |
| ST1288 | M   | 2   | 0.091 |
| ST1296 | M   | 2   | 0.183 |
| ST0805 | M   | 3   | 0.179 |
| ST0812 | M   | 4   | 0.166 |
| ST1244 | M   | 4   | 0.093 |
| ST0859 | M   | 6   | 1.186 |
| ST1292 | M   | 6   | 0.181 |
| ST0878 | M   | 8   | 1.015 |
| ST1246 | M   | 8   | 0.128 |
| ST0801 | M   | 4   | 0.085 |
| ST0850 | M   | 0   | 0.075 |
| ST1142 | F   | 2   | 0.095 |
| ST1177 | F   | 3   | 0.207 |

| code   | M/F | age | OD    |
|--------|-----|-----|-------|
| ST0837 | F   | 10  | 0.242 |
| ST0858 | M   | 10  | 2.113 |
| ST0955 | M   | 10  | 0.159 |
| ST1208 | F   | 10  | 0.129 |
| ST1245 | F   | 10  | 0.151 |
| ST1265 | F   | 10  | 1.828 |
| ST1278 | F   | 10  | 0.166 |
| ST1119 | M   | 11  | 0.086 |
| ST1160 | F   | 11  | 0.114 |
| ST1207 | M   | 11  | 0.172 |
| ST1215 | M   | 11  | 1.544 |
| ST1218 | F   | 11  | 0.078 |
| ST1238 | F   | 11  | 1.137 |
| ST1240 | F   | 11  | 0.092 |
| ST1251 | F   | 11  | 0.082 |
| ST0886 | F   | 12  | 0.147 |
| ST1216 | M   | 12  | 0.121 |
| ST1258 | M   | 12  | 0.156 |
| ST1271 | M   | 12  | 0.131 |
| ST1299 | M   | 12  | 0.241 |
| ST1120 | M   | 13  | 0.084 |
| ST1175 | M   | 13  | 0.182 |
| ST1210 | F   | 13  | 1.761 |
| ST1283 | F   | 13  | 2.147 |
| ST1183 | F   | 14  | 0.123 |
| ST1213 | F   | 14  | 0.13  |
| ST1234 | M   | 14  | 0.167 |
| ST1253 | M   | 14  | 0.989 |
| ST1255 | M   | 14  | 1.353 |
| ST1259 | M   | 14  | 0.108 |
| ST1261 | M   | 14  | 0.157 |
| ST1262 | M   | 14  | 0.073 |
| ST1269 | F   | 14  | 1.746 |
| ST1290 | F   | 15  | 0.081 |
| ST1266 | M   | 12  | 1.035 |
| ST0909 | F   | 17  | 0.13  |
| ST0975 | F   | 17  | 0.191 |
| ST0992 | F   | 16  | 0.195 |

| code   | M/F | age | OD    |
|--------|-----|-----|-------|
| ST1404 | F   | 22  | 0.099 |
| ST1016 | F   | 25  | 0.09  |
| ST0937 | F   | 26  | 0.751 |
| ST0944 | F   | 26  | 0.125 |
| ST1199 | F   | 26  | 0.145 |
| ST0946 | F   | 27  | 0.085 |
| ST1468 | F   | 27  | 0.222 |
| ST1421 | F   | 28  | 0.102 |
| ST1355 | F   | 29  | 0.156 |
| ST1484 | F   | 29  | 0.196 |
| ST0751 | M   | 21  | 0.13  |
| ST1104 | M   | 25  | 0.777 |

| code   | M/F | age | OD    |
|--------|-----|-----|-------|
| ST1390 | F   | 32  | 0.135 |
| ST1040 | F   | 33  | 0.824 |
| ST1095 | F   | 33  | 0.147 |
| ST1348 | F   | 33  | 1.421 |
| ST1370 | F   | 33  | 1.085 |
| ST0763 | F   | 35  | 0.183 |
| ST0769 | F   | 35  | 0.193 |
| ST1061 | F   | 35  | 0.141 |
| ST1088 | F   | 35  | 0.111 |
| ST1198 | F   | 35  | 1.272 |
| ST1362 | F   | 36  | 0.174 |
| ST1400 | F   | 36  | 0.137 |
| ST1419 | F   | 36  | 0.1   |
| ST1467 | F   | 36  | 0.123 |
| ST1315 | F   | 37  | 0.092 |
| ST1394 | F   | 37  | 1.267 |
| ST1406 | F   | 37  | 0.097 |
| ST0787 | F   | 38  | 0.148 |
| ST1350 | F   | 38  | 0.112 |
| ST1398 | F   | 38  | 1.777 |
| ST1435 | F   | 38  | 0.101 |
| ST1034 | F   | 39  | 1.425 |
| ST1347 | F   | 39  | 0.181 |
| ST1415 | F   | 39  | 0.907 |
| ST1473 | F   | 39  | 0.103 |
| ST1077 | M   | 30  | 0.173 |
| ST1321 | M   | 30  | 1.02  |
| ST1032 | M   | 34  | 0.222 |
| ST0988 | M   | 36  | 1.446 |
| ST1008 | M   | 37  | 0.123 |
| ST1311 | M   | 37  | 0.152 |
| ST1336 | M   | 38  | 0.84  |
| ST1041 | M   | 39  | 1.191 |
| ST1356 | F   | 35  | 0.138 |
| ST1372 | F   | 39  | 0.163 |
| ST1027 | F   | 34  | 0.243 |

| code   | M/F | age | OD    |
|--------|-----|-----|-------|
| ST1055 | F   | 40  | 0.188 |
| ST1070 | F   | 40  | 0.899 |
| ST1352 | F   | 40  | 0.772 |
| ST1420 | F   | 40  | 0.156 |
| ST0941 | F   | 41  | 0.968 |
| ST1457 | F   | 41  | 0.111 |
| ST1476 | F   | 41  | 0.154 |
| ST1301 | F   | 43  | 0.116 |
| ST1395 | F   | 43  | 0.15  |
| ST1083 | F   | 44  | 2.284 |
| ST0948 | F   | 45  | 1.382 |
| ST1059 | F   | 45  | 1.2   |
| ST1076 | F   | 45  | 0.386 |
| ST1318 | F   | 45  | 0.738 |
| ST1343 | F   | 45  | 0.541 |
| ST1442 | F   | 48  | 0.59  |
| ST1408 | F   | 49  | 0.698 |
| ST1056 | M   | 40  | 0.157 |
| ST1365 | M   | 40  | 0.14  |
| ST0752 | M   | 41  | 0.21  |
| ST1049 | M   | 41  | 1.932 |
| ST1057 | M   | 43  | 0.096 |
| ST1310 | M   | 43  | 0.808 |
| ST1021 | M   | 46  | 0.72  |
| ST1072 | M   | 46  | 0.093 |
| ST1319 | M   | 46  | 0.735 |
| ST1333 | M   | 46  | 0.895 |
| ST1443 | M   | 46  | 0.113 |
| ST1030 | M   | 47  | 0.553 |
| ST1323 | M   | 47  | 0.748 |
| ST1460 | M   | 47  | 0.353 |
| ST1320 | M   | 48  | 0.136 |
| ST0800 | M   | 49  | 0.545 |
| ST1458 | M   | 49  | 1.314 |
| ST1069 | M   | 46  | 0.143 |
| ST1424 | F   | 46  | 0.699 |
| ST1324 | M   | 45  | 0.57  |
| ST1330 | F   | 40  | 0.169 |

| code   | M/F | age | OD    |
|--------|-----|-----|-------|
| ST1098 | F   | 50  | 0.878 |
| ST1375 | F   | 50  | 0.889 |
| ST1393 | F   | 51  | 0.078 |
| ST1455 | F   | 51  | 0.066 |
| ST1465 | F   | 51  | 0.134 |
| ST0766 | F   | 52  | 0.157 |
| ST1475 | F   | 53  | 0.184 |
| ST0788 | F   | 54  | 0.093 |
| ST1383 | F   | 54  | 1.206 |
| ST0791 | F   | 55  | 0.164 |
| ST1003 | F   | 55  | 0.233 |
| ST1470 | F   | 55  | 1.011 |
| ST1002 | F   | 56  | 0.207 |
| ST1367 | F   | 56  | 0.934 |
| ST1477 | F   | 57  | 0.736 |
| ST0789 | F   | 58  | 0.163 |
| ST1464 | F   | 59  | 0.289 |
| ST1342 | M   | 51  | 0.149 |
| ST1399 | M   | 51  | 0.078 |
| ST1036 | M   | 52  | 0.254 |
| ST1012 | M   | 53  | 0.145 |
| ST1029 | M   | 53  | 1.109 |
| ST1091 | M   | 53  | 0.168 |
| ST1019 | M   | 54  | 0.911 |
| ST1004 | M   | 54  | 1.387 |
| ST1099 | M   | 54  | 0.186 |
| ST1100 | M   | 55  | 0.166 |
| ST1454 | M   | 55  | 1.935 |
| ST1052 | M   | 56  | 1.102 |
| ST1335 | M   | 57  | 0.13  |
| ST1413 | M   | 57  | 1.131 |
| ST1001 | M   | 58  | 1.147 |
| ST1007 | M   | 58  | 0.624 |
| ST1344 | M   | 58  | 0.187 |
| ST0762 | F   | 51  | 0.601 |
| ST0775 | M   | 56  | 0.292 |
| ST0795 | F   | 58  | 1.006 |
| ST1466 | M   | 50  | 0.171 |

| code   | M/F | age | OD    |
|--------|-----|-----|-------|
| LP0057 | M   | 1   | 0.166 |
| LP0186 | M   | 1   | 0.146 |
| LP0297 | M   | 3   | 0.157 |
| LP0020 | M   | 4   | 0.085 |
| LP0526 | M   | 4   | 0.159 |
| LP0573 | M   | 4   | 0.134 |
| LP0622 | M   | 4   | 0.138 |
| LP0137 | M   | 5   | 0.167 |
| LP0157 | M   | 5   | 0.186 |
| LP0212 | M   | 5   | 0.125 |
| LP0150 | M   | 6   | 0.108 |
| LP0181 | M   | 6   | 0.155 |
| LP0205 | M   | 6   | 0.096 |
| LP0332 | M   | 6   | 0.181 |
| LP0677 | M   | 7   | 0.209 |
| LP0702 | M   | 7   | 0.198 |
| LP0101 | M   | 8   | 0.174 |
| LP0176 | M   | 8   | 0.174 |
| LP0151 | M   | 9   | 0.1   |
| LP0122 | F   | 1   | 0.154 |
| LP0133 | F   | 1   | 0.158 |
| LP0210 | F   | 1   | 0.149 |
| LP0413 | F   | 1   | 0.175 |
| LP0479 | F   | 1   | 0.109 |
| LP0048 | F   | 2   | 0.096 |
| LP0132 | F   | 2   | 0.21  |
| LP0480 | F   | 2   | 0.125 |
| LP0138 | F   | 3   | 0.248 |
| LP0232 | F   | 4   | 0.276 |
| LP0527 | F   | 4   | 0.125 |
| LP0740 | F   | 5   | 0.13  |
| LP0079 | F   | 6   | 0.144 |
| LP0463 | F   | 6   | 0.165 |
| LP0665 | F   | 6   | 0.148 |
| LP0725 | F   | 7   | 0.104 |
| LP0747 | F   | 7   | 0.102 |
| LP0162 | F   | 8   | 0.087 |
| LP0355 | F   | 9   | 0.098 |

| code   | M/F | age | OD    |
|--------|-----|-----|-------|
| LP0222 | F   | 10  | 0.107 |
| LP0171 | M   | 12  | 0.085 |
| LP0165 | M   | 13  | 0.098 |
| LP0257 | M   | 13  | 0.089 |
| LP0400 | M   | 13  | 0.139 |
| LP0149 | M   | 14  | 0.101 |
| LP0535 | M   | 14  | 0.073 |
| LP0671 | M   | 15  | 0.259 |
| LP0703 | M   | 15  | 0.153 |
| LP0017 | M   | 16  | 0.138 |
| LP0005 | M   | 17  | 0.143 |
| LP0378 | M   | 17  | 0.2   |
| LP0746 | M   | 17  | 0.171 |
| LP0752 | M   | 17  | 0.253 |
| LP0487 | M   | 18  | 0.131 |
| LP0570 | M   | 18  | 0.084 |
| LP0672 | M   | 19  | 0.107 |
| LP0511 | F   | 10  | 0.11  |
| LP0099 | F   | 11  | 0.073 |
| LP0054 | F   | 12  | 0.113 |
| LP0627 | F   | 12  | 0.11  |
| LP0050 | F   | 14  | 0.084 |
| LP0472 | F   | 14  | 0.079 |
| LP0510 | F   | 14  | 0.221 |
| LP0537 | F   | 14  | 0.116 |
| LP0408 | F   | 16  | 0.677 |
| LP0586 | F   | 17  | 0.129 |
| LP0612 | F   | 17  | 0.202 |
| LP0684 | F   | 17  | 0.52  |
| LP0574 | F   | 18  | 0.198 |
| LP0602 | F   | 18  | 0.098 |
| LP0751 | F   | 18  | 0.125 |
| LP0522 | F   | 19  | 0.129 |
| LP0328 | F   | 11  | 0.135 |

| code   | M/F | age | OD    |
|--------|-----|-----|-------|
| LP0121 | M   | 20  | 0.072 |
| LP0338 | M   | 20  | 0.155 |
| LP0730 | M   | 20  | 0.1   |
| LP0688 | M   | 21  | 0.075 |
| LP0732 | M   | 21  | 0.122 |
| LP0019 | M   | 22  | 0.122 |
| LP0411 | M   | 22  | 0.102 |
| LP0555 | M   | 22  | 0.097 |
| LP0695 | M   | 25  | 0.104 |
| LP0715 | M   | 27  | 0.166 |
| LP0711 | M   | 28  | 0.202 |
| LP0728 | M   | 28  | 0.145 |
| LP0717 | M   | 29  | 0.219 |
| LP0260 | F   | 20  | 0.173 |
| LP0379 | F   | 20  | 0.149 |
| LP0629 | F   | 20  | 0.186 |
| LP0096 | F   | 22  | 0.091 |
| LP0219 | F   | 22  | 0.16  |
| LP0541 | F   | 22  | 0.149 |
| LP0217 | F   | 24  | 0.112 |
| LP0638 | F   | 24  | 2.508 |
| LP0218 | F   | 25  | 0.107 |
| LP0370 | F   | 25  | 0.138 |
| LP0427 | F   | 25  | 0.106 |
| LP0613 | F   | 25  | 0.117 |
| LP0615 | F   | 27  | 0.463 |
| LP0513 | F   | 28  | 0.118 |
| LP0568 | F   | 29  | 0.205 |
| LP0285 | M   | 23  | 0.089 |
| LP0407 | M   | 24  | 0.116 |
| LP0261 | M   | 26  | 0.142 |
| LP0262 | F   | 26  | 0.129 |
| LP0607 | M   | 27  | 0.124 |
| LP0249 | M   | 29  | 0.13  |

| code   | M/F | age | OD    |
|--------|-----|-----|-------|
| LP0041 | M   | 30  | 0.129 |
| LP0437 | M   | 30  | 0.109 |
| LP0547 | M   | 30  | 0.533 |
| LP0422 | M   | 31  | 0.122 |
| LP0680 | M   | 31  | 0.113 |
| LP0674 | M   | 32  | 0.314 |
| LP0394 | M   | 33  | 0.161 |
| LP0528 | M   | 33  | 0.097 |
| LP0736 | M   | 33  | 0.114 |
| LP0595 | M   | 34  | 0.567 |
| LP0606 | M   | 34  | 0.109 |
| LP0714 | M   | 34  | 0.146 |
| LP0741 | M   | 35  | 0.229 |
| LP0753 | M   | 35  | 0.133 |
| LP0387 | M   | 37  | 0.129 |
| LP0667 | M   | 37  | 0.099 |
| LP0669 | M   | 37  | 0.534 |
| LP0294 | M   | 38  | 0.117 |
| LP0478 | M   | 38  | 0.244 |
| LP0682 | M   | 38  | 0.612 |
| LP0689 | M   | 38  | 0.145 |
| LP0633 | F   | 30  | 0.499 |
| LP0039 | F   | 31  | 0.318 |
| LP0388 | F   | 31  | 0.851 |
| LP0512 | F   | 31  | 0.133 |
| LP0267 | F   | 32  | 0.069 |
| LP0225 | F   | 33  | 0.305 |
| LP0242 | F   | 34  | 0.128 |
| LP0291 | F   | 34  | 0.817 |
| LP0072 | F   | 35  | 1.429 |
| LP0252 | F   | 35  | 0.193 |
| LP0519 | F   | 35  | 0.117 |
| LP0538 | F   | 35  | 0.47  |
| LP0418 | F   | 36  | 0.095 |
| LP0539 | F   | 37  | 0.438 |
| LP0066 | F   | 38  | 0.2   |
| LP0226 | F   | 39  | 0.181 |
| LP0268 | F   | 39  | 0.126 |
| LP0430 | F   | 39  | 0.088 |

| code   | M/F | age | OD    |
|--------|-----|-----|-------|
| LP0001 | M   | 40  | 0.095 |
| LP0721 | M   | 40  | 0.204 |
| LP0271 | M   | 41  | 0.115 |
| LP0030 | M   | 43  | 1.132 |
| LP0317 | M   | 43  | 0.2   |
| LP0351 | M   | 43  | 0.176 |
| LP0420 | M   | 43  | 0.162 |
| LP0476 | M   | 43  | 0.101 |
| LP0559 | M   | 43  | 0.389 |
| LP0655 | M   | 43  | 0.939 |
| LP0600 | M   | 45  | 0.138 |
| LP0061 | M   | 46  | 0.582 |
| LP0286 | M   | 47  | 0.141 |
| LP0368 | M   | 47  | 0.708 |
| LP0654 | M   | 47  | 0.261 |
| LP0565 | M   | 49  | 0.746 |
| LP0436 | F   | 40  | 0.143 |
| LP0520 | F   | 40  | 0.461 |
| LP0660 | F   | 41  | 0.133 |
| LP0112 | F   | 45  | 0.061 |
| LP0250 | F   | 45  | 0.141 |
| LP0455 | F   | 45  | 1.024 |
| LP0287 | F   | 46  | 0.12  |
| LP0348 | F   | 46  | 1.992 |
| LP0111 | F   | 47  | 0.879 |
| LP0554 | F   | 47  | 0.546 |
| LP0009 | F   | 48  | 0.281 |
| LP0107 | F   | 48  | 0.644 |
| LP0253 | F   | 48  | 0.508 |
| LP0277 | F   | 49  | 0.144 |
| LP0357 | F   | 49  | 0.185 |
| LP0453 | F   | 49  | 0.189 |
| LP0718 | M   | 48  | 0.118 |
| LP0093 | F   | 42  | 1.219 |

| code   | M/F | age | OD    |
|--------|-----|-----|-------|
| LP0319 | F   | 50  | 1.126 |
| LP0428 | M   | 50  | 1.13  |
| LP0315 | M   | 52  | 0.861 |
| LP0007 | M   | 54  | 0.689 |
| LP0431 | M   | 54  | 0.285 |
| LP0681 | M   | 54  | 1.165 |
| LP0450 | M   | 55  | 0.19  |
| LP0552 | M   | 55  | 0.24  |
| LP0679 | M   | 55  | 0.128 |
| LP0469 | M   | 56  | 0.419 |
| LP0524 | M   | 56  | 1.282 |
| LP0623 | M   | 56  | 0.765 |
| LP0405 | M   | 57  | 1.018 |
| LP0460 | M   | 57  | 1.22  |
| LP0775 | M   | 57  | 0.371 |
| LP0763 | M   | 58  | 0.489 |
| LP0244 | M   | 59  | 0.221 |
| LP0404 | M   | 59  | 0.996 |
| LP0777 | M   | 59  | 0.6   |
| LP0543 | F   | 50  | 0.82  |
| LP0010 | F   | 51  | 0.139 |
| LP0228 | F   | 51  | 1.276 |
| LP0071 | F   | 52  | 1.936 |
| LP0441 | F   | 52  | 0.688 |
| LP0675 | F   | 52  | 0.137 |
| LP0458 | F   | 53  | 0.275 |
| LP0620 | F   | 53  | 1.612 |
| LP0278 | F   | 54  | 0.553 |
| LP0325 | F   | 55  | 0.462 |
| LP0215 | F   | 56  | 0.079 |
| LP0762 | F   | 56  | 0.089 |
| LP0772 | F   | 56  | 0.177 |
| LP0307 | F   | 58  | 0.543 |
| LP0769 | F   | 58  | 1.183 |

| code   | M/F | age | OD    |
|--------|-----|-----|-------|
| AY0118 | M   | 3   | 0.177 |
| AY0132 | M   | 4   | 0.292 |
| AY0143 | M   | 4   | 0.107 |
| AY0079 | M   | 5   | 0.209 |
| AY0109 | M   | 5   | 0.157 |
| AY0123 | M   | 5   | 0.188 |
| AY0155 | M   | 5   | 0.178 |
| AY0077 | M   | 6   | 0.286 |
| AY0145 | M   | 6   | 0.12  |
| AY0160 | M   | 6   | 0.237 |
| AY0161 | M   | 6   | 0.322 |
| AY0215 | M   | 7   | 0.17  |
| AY0187 | M   | 8   | 0.193 |
| AY0196 | M   | 8   | 0.12  |
| AY0211 | M   | 8   | 0.09  |
| AY0251 | M   | 9   | 0.179 |
| AY0252 | M   | 9   | 0.208 |
| AY0073 | F   | 3   | 0.177 |
| AY0097 | F   | 3   | 0.137 |
| AY0106 | F   | 3   | 0.166 |
| AY0107 | F   | 4   | 0.084 |
| AY0111 | F   | 4   | 0.166 |
| AY0135 | F   | 4   | 0.147 |
| AY0103 | F   | 5   | 0.159 |
| AY0119 | F   | 5   | 0.146 |
| AY0153 | F   | 5   | 0.094 |
| AY0074 | F   | 6   | 0.113 |
| AY0142 | F   | 6   | 0.127 |
| AY0157 | F   | 6   | 0.092 |
| AY0185 | F   | 7   | 0.118 |
| AY0205 | F   | 7   | 0.114 |
| AY0210 | F   | 8   | 0.114 |
| AY0232 | F   | 9   | 0.112 |
| AY0240 | F   | 9   | 0.145 |

| code   | M/F | age | OD    |
|--------|-----|-----|-------|
| AY0235 | M   | 10  | 0.242 |
| AY0241 | M   | 10  | 0.081 |
| AY0248 | M   | 10  | 0.105 |
| AY0253 | M   | 10  | 0.158 |
| AY0257 | M   | 10  | 0.165 |
| AY0262 | M   | 10  | 0.116 |
| AY0263 | M   | 10  | 0.139 |
| AY0269 | M   | 10  | 0.135 |
| AY0415 | M   | 12  | 0.08  |
| AY0416 | M   | 13  | 0.077 |
| AY0398 | M   | 14  | 0.207 |
| AY0400 | M   | 14  | 0.082 |
| AY0394 | M   | 17  | 0.119 |
| AY0389 | M   | 18  | 0.174 |
| AY0427 | M   | 18  | 0.166 |
| AY0610 | M   | 15  | 0.17  |
| AY0611 | M   | 15  | 0.238 |
| AY0230 | F   | 10  | 0.207 |
| AY0233 | F   | 10  | 0.141 |
| AY0244 | F   | 10  | 0.14  |
| AY0246 | F   | 10  | 0.123 |
| AY0249 | F   | 10  | 0.137 |
| AY0250 | F   | 10  | 0.146 |
| AY0255 | F   | 10  | 0.103 |
| AY0259 | F   | 10  | 0.131 |
| AY0411 | F   | 12  | 0.111 |
| AY0413 | F   | 12  | 0.1   |
| AY0417 | F   | 14  | 0.148 |
| AY0395 | F   | 15  | 0.108 |
| AY0579 | F   | 16  | 0.21  |
| AY0373 | F   | 17  | 0.142 |
| AY0382 | F   | 17  | 0.126 |
| AY0425 | F   | 17  | 0.112 |
| AY0580 | F   | 16  | 0.126 |
| AY0248 | M   | 10  | 0.144 |
| AY0249 | F   | 10  | 0.129 |
| AY0740 | M   | 19  | 0.104 |
| AY0741 | M   | 12  | 0.109 |

| code   | M/F | age | OD    |
|--------|-----|-----|-------|
| AY0447 | M   | 21  | 0.116 |
| AY0448 | M   | 21  | 0.175 |
| AY0446 | M   | 24  | 0.089 |
| AY0376 | M   | 27  | 0.167 |
| AY0281 | M   | 20  | 0.11  |
| AY0296 | M   | 20  | 0.108 |
| AY0431 | M   | 20  | 0.143 |
| AY0554 | M   | 21  | 0.113 |
| AY0573 | M   | 24  | 0.193 |
| AY0574 | M   | 27  | 0.309 |
| AY0576 | M   | 27  | 0.17  |
| AY0279 | M   | 29  | 0.109 |
| AY0449 | M   | 29  | 0.123 |
| AY0756 | M   | 21  | 0.186 |
| AY0629 | M   | 22  | 0.211 |
| AY0650 | M   | 24  | 0.232 |
| AY0633 | M   | 27  | 0.201 |
| AY0387 | F   | 20  | 0.25  |
| AY0432 | F   | 20  | 0.079 |
| AY0444 | F   | 21  | 0.226 |
| AY0392 | F   | 23  | 0.094 |
| AY0443 | F   | 23  | 0.09  |
| AY0445 | F   | 23  | 0.092 |
| AY0577 | F   | 23  | 0.073 |
| AY0442 | F   | 24  | 0.129 |
| AY0390 | F   | 28  | 0.134 |
| AY0380 | F   | 29  | 0.256 |
| AY0347 | F   | 23  | 0.102 |
| AY0511 | F   | 23  | 0.166 |
| AY0287 | F   | 24  | 0.095 |
| AY0560 | F   | 28  | 0.971 |
| AY0736 | F   | 21  | 0.102 |
| AY0758 | F   | 23  | 0.136 |
| AY0628 | F   | 27  | 0.229 |
| AY0737 | M   | 29  | 0.091 |
| AY0744 | M   | 24  | 0.172 |

| code   | M/F | age | OD    |
|--------|-----|-----|-------|
| AY0458 | M   | 32  | 0.209 |
| AY0450 | M   | 32  | 0.286 |
| AY0454 | M   | 33  | 0.101 |
| AY0529 | M   | 35  | 0.303 |
| AY0330 | M   | 36  | 0.139 |
| AY0456 | M   | 36  | 0.135 |
| AY0495 | M   | 36  | 0.204 |
| AY0307 | M   | 39  | 0.09  |
| AY0747 | M   | 30  | 0.11  |
| AY0645 | M   | 33  | 0.133 |
| AY0641 | M   | 34  | 0.127 |
| AY0648 | M   | 34  | 0.4   |
| AY0724 | M   | 35  | 0.152 |
| AY0691 | M   | 36  | 0.175 |
| AY0723 | M   | 36  | 1.046 |
| AY0742 | M   | 36  | 0.154 |
| AY0738 | M   | 38  | 0.24  |
| AY0550 | F   | 30  | 0.093 |
| AY0393 | F   | 32  | 0.312 |
| AY0397 | F   | 32  | 0.206 |
| AY0375 | F   | 33  | 0.124 |
| AY0391 | F   | 33  | 0.099 |
| AY0381 | F   | 34  | 0.135 |
| AY0378 | F   | 35  | 0.369 |
| AY0396 | F   | 35  | 0.377 |
| AY0459 | F   | 35  | 0.158 |
| AY0379 | F   | 36  | 0.139 |
| AY0372 | F   | 37  | 0.184 |
| AY0388 | F   | 37  | 0.148 |
| AY0402 | F   | 36  | 0.113 |
| AY0359 | F   | 37  | 0.131 |
| AY0541 | F   | 37  | 0.155 |
| AY0365 | F   | 39  | 1.034 |
| AY0642 | F   | 38  | 0.18  |
| AY0709 | F   | 35  | 0.032 |
| AY0714 | F   | 31  | 0.132 |

| code   | M/F | age | OD    |
|--------|-----|-----|-------|
| AY0530 | M   | 43  | 0.155 |
| AY0318 | M   | 44  | 1.252 |
| AY0462 | M   | 46  | 0.209 |
| AY0467 | M   | 46  | 0.25  |
| AY0501 | M   | 46  | 0.496 |
| AY0297 | M   | 47  | 0.125 |
| AY0472 | M   | 47  | 1.343 |
| AY0315 | M   | 48  | 0.217 |
| AY0280 | M   | 49  | 0.096 |
| AY0745 | M   | 40  | 1.764 |
| AY0746 | M   | 40  | 0.104 |
| AY0722 | M   | 41  | 0.175 |
| AY0586 | M   | 42  | 0.293 |
| AY0698 | M   | 44  | 0.296 |
| AY0730 | M   | 44  | 0.492 |
| AY0584 | M   | 47  | 0.809 |
| AY0732 | M   | 47  | 0.246 |
| AY0377 | F   | 43  | 1.283 |
| AY0512 | F   | 40  | 0.238 |
| AY0271 | F   | 41  | 0.148 |
| AY0368 | F   | 41  | 0.269 |
| AY0403 | F   | 41  | 0.33  |
| AY0545 | F   | 42  | 0.264 |
| AY0538 | F   | 43  | 0.225 |
| AY0313 | F   | 44  | 0.113 |
| AY0340 | F   | 44  | 0.507 |
| AY0301 | F   | 46  | 0.371 |
| AY0344 | F   | 47  | 0.659 |
| AY0321 | F   | 48  | 1.124 |
| AY0461 | F   | 48  | 0.115 |
| AY0564 | F   | 48  | 0.407 |
| AY0473 | F   | 49  | 0.242 |
| AY0690 | F   | 46  | 0.647 |
| AY0585 | F   | 49  | 0.135 |
| AY0557 | M   | 49  | 0.116 |
| AY0684 | F   | 46  | 0.339 |

| code   | M/F | age | OD    |
|--------|-----|-----|-------|
| AY0294 | M   | 50  | 0.129 |
| AY0331 | M   | 50  | 0.611 |
| AY0470 | M   | 50  | 0.214 |
| AY0471 | M   | 50  | 0.478 |
| AY0552 | M   | 50  | 0.148 |
| AY0549 | M   | 51  | 0.527 |
| AY0273 | M   | 55  | 0.774 |
| AY0303 | M   | 57  | 0.807 |
| AY0591 | M   | 50  | 0.214 |
| AY0696 | M   | 50  | 1.407 |
| AY0735 | M   | 50  | 1.762 |
| AY0654 | M   | 52  | 0.172 |
| AY0660 | M   | 52  | 0.691 |
| AY0666 | M   | 54  | 0.133 |
| AY0672 | M   | 56  | 1.122 |
| AY0658 | M   | 57  | 1.413 |
| AY0668 | M   | 57  | 0.288 |
| AY0385 | F   | 50  | 0.113 |
| AY0490 | F   | 51  | 0.181 |
| AY0487 | F   | 52  | 1.49  |
| AY0489 | F   | 52  | 1.135 |
| AY0386 | F   | 53  | 0.09  |
| AY0374 | F   | 59  | 1.714 |
| AY0486 | F   | 59  | 0.452 |
| AY0488 | F   | 59  | 0.325 |
| AY0384 | F   | 51  | 1.444 |
| AY0326 | F   | 57  | 0.618 |
| AY0524 | F   | 57  | 0.991 |
| AY0478 | F   | 58  | 0.18  |
| AY0675 | F   | 52  | 0.16  |
| AY0662 | F   | 54  | 0.114 |
| AY0685 | F   | 55  | 0.449 |
| AY0665 | F   | 57  | 0.34  |
| AY0725 | F   | 57  | 0.261 |
| AY0718 | F   | 52  | 0.424 |
| AY0728 | F   | 55  | 0.13  |

| CODE   | M/F | AGE | OD    |
|--------|-----|-----|-------|
| ST0327 | M   | 1   | 0.114 |
| ST0194 | M   | 2   | 0.273 |
| ST0019 | M   | 3   | 0.106 |
| ST0278 | F   | 4   | 1.328 |
| ST0279 | F   | 6   | 1.577 |
| ST0280 | F   | 8   | 1.673 |
| ST0491 | M   | 4   | 0.056 |
| ST0492 | F   | 5   | 1.294 |
| ST0439 | F   | 9   | 0.688 |
| ST0563 | F   | 9   | 0.073 |
| ST705  | M   | 3   | 1.725 |
| ST688  | M   | 1   | 0.069 |
| ST679  | M   | 1   | 0.198 |
| ST666  | F   | 6   | 0.994 |
| ST682  | M   | 5   | 1.44  |
| ST709  | M   | 0   | 0.059 |
| ST703  | M   | 1   | 1.195 |
| ST702  | M   | 7   | 1.698 |
| ST667  | F   | 0   | 0.065 |
| ST681  | F   | 2   | 0.082 |
| ST668  | F   | 2   | 0.052 |
| ST665  | M   | 3   | 0.145 |
| ST712  | M   | 4   | 0.235 |
| ST675  | F   | 9   | 0.083 |
| ST683  | F   | 3   | 0.06  |
| ST707  | F   | 2   | 0.382 |
| ST671  | F   | 3   | 0.915 |
| ST695  | F   | 3   | 1.143 |
| ST692  | M   | 0   | 0.104 |
| ST684  | F   | 1   | 0.051 |
| ST677  | F   | 4   | 0.115 |
| ST696  | M   | 3   | 0.181 |
| ST669  | F   | 2   | 1.322 |
| ST680  | F   | 2   | 0.186 |

| CODE   | M/F | AGE | OD    |
|--------|-----|-----|-------|
| ST0298 | F   | 10  | 0.145 |
| ST0411 | F   | 18  | 0.108 |
| ST0404 | F   | 19  | 1.284 |
| ST0015 | F   | 19  | 0.104 |
| ST0024 | M   | 10  | 0.916 |
| ST0264 | M   | 14  | 0.154 |
| ST0268 | M   | 14  | 1.27  |
| ST0289 | M   | 14  | 0.928 |
| ST0025 | M   | 12  | 0.061 |
| ST0048 | M   | 19  | 1.596 |
| ST0193 | M   | 19  | 0.926 |
| ST0507 | M   | 18  | 1.117 |
| ST0508 | F   | 18  | 0.777 |
| ST0509 | F   | 18  | 1.8   |
| ST0523 | F   | 17  | 1.167 |
| ST0524 | F   | 17  | 1.898 |
| ST0525 | F   | 19  | 1.714 |
| ST0526 | F   | 19  | 0.148 |
| ST0546 | F   | 19  | 1.588 |
| ST0553 | F   | 19  | 1.455 |
| ST0578 | M   | 15  | 0.07  |
| ST678  | F   | 10  | 0.082 |
| ST689  | F   | 11  | 0.133 |
| ST690  | F   | 13  | 0.201 |
| ST706  | M   | 11  | 0.721 |
| ST708  | M   | 13  | 1.563 |
| ST713  | M   | 12  | 0.239 |

| CODE   | M/F | AGE | OD    |
|--------|-----|-----|-------|
| ST0272 | F   | 20  | 0.68  |
| ST0029 | F   | 21  | 1.028 |
| ST0033 | F   | 21  | 1.807 |
| ST0020 | F   | 24  | 1.611 |
| ST0208 | F   | 24  | 1.3   |
| ST0040 | F   | 25  | 1.554 |
| ST0124 | F   | 25  | 1.8   |
| ST0140 | F   | 25  | 0.607 |
| ST0141 | F   | 25  | 1.001 |
| ST0218 | F   | 25  | 1.626 |
| ST0206 | F   | 26  | 1.602 |
| ST0211 | F   | 26  | 0.172 |
| ST0424 | F   | 26  | 0.747 |
| ST0430 | F   | 26  | 0.806 |
| ST0021 | F   | 27  | 1.187 |
| ST0131 | F   | 28  | 0.5   |
| ST0207 | F   | 28  | 0.051 |
| ST0216 | F   | 28  | 1.708 |
| ST0126 | F   | 29  | 1.62  |
| ST0135 | F   | 29  | 1.705 |
| ST0221 | M   | 26  | 1.521 |
| ST0239 | M   | 26  | 1.839 |
| ST0306 | M   | 26  | 0.677 |
| ST0326 | M   | 26  | 1.559 |
| ST0362 | M   | 26  | 0.529 |
| ST0285 | M   | 27  | 1.851 |
| ST0235 | M   | 28  | 1.809 |
| ST0331 | M   | 28  | 1.825 |
| ST0367 | M   | 28  | 0.805 |
| ST0371 | M   | 28  | 0.864 |
| ST0049 | M   | 21  | 1.247 |
| ST0348 | M   | 21  | 0.772 |
| ST0253 | M   | 24  | 1.492 |
| ST0204 | M   | 25  | 1.385 |
| ST0309 | M   | 25  | 0.091 |
| ST0393 | M   | 25  | 1.349 |
| ST0277 | M   | 26  | 1.548 |
| ST0284 | M   | 26  | 0.425 |

| CODE   | M/V | AGE | OD    |
|--------|-----|-----|-------|
| ST0014 | F   | 31  | 1.248 |
| ST0159 | F   | 31  | 0.988 |
| ST0246 | F   | 32  | 0.143 |
| ST0247 | F   | 32  | 1.692 |
| ST0359 | F   | 33  | 1.833 |
| ST0360 | F   | 33  | 1.306 |
| ST0315 | F   | 34  | 1.39  |
| ST0397 | F   | 34  | 1.653 |
| ST0421 | F   | 35  | 0.059 |
| ST0125 | F   | 36  | 1.868 |
| ST0304 | F   | 37  | 0.815 |
| ST0313 | F   | 37  | 1.483 |
| ST0138 | F   | 39  | 1.725 |
| ST0224 | F   | 39  | 1.556 |
| ST0433 | F   | 30  | 1.762 |
| ST0422 | F   | 33  | 1.808 |
| ST0363 | M   | 30  | 0.175 |
| ST0399 | M   | 30  | 0.109 |
| ST0283 | M   | 33  | 1.005 |
| ST0034 | M   | 34  | 0.789 |
| ST0243 | M   | 34  | 1.708 |
| ST0254 | M   | 34  | 2.023 |
| ST0023 | M   | 35  | 1.719 |
| ST0400 | M   | 36  | 1.066 |
| ST0409 | M   | 36  | 1.82  |
| ST0002 | M   | 37  | 1.558 |
| ST0257 | M   | 37  | 1.525 |
| ST0353 | M   | 37  | 1.627 |
| ST0333 | M   | 38  | 1.653 |
| ST0249 | M   | 39  | 0.639 |
| ST0406 | M   | 39  | 1.635 |
| ST0506 | F   | 33  | 0.956 |
| ST0510 | M   | 39  | 1.473 |
| ST0560 | M   | 35  | 1.948 |
| ST0245 | F   | 31  | 0.835 |
| ST0290 | F   | 37  | 1.904 |

| CODE   | M/F | AGE | OD    |
|--------|-----|-----|-------|
| ST0310 | F   | 40  | 1.312 |
| ST0176 | F   | 41  | 1.822 |
| ST0220 | F   | 41  | 1.47  |
| ST0223 | F   | 42  | 1.321 |
| ST0428 | F   | 42  | 1.798 |
| ST0312 | F   | 45  | 1.143 |
| ST0378 | F   | 45  | 1.777 |
| ST0215 | F   | 46  | 0.49  |
| ST0320 | F   | 46  | 0.706 |
| ST0318 | F   | 48  | 1.154 |
| ST0347 | F   | 48  | 1.369 |
| ST0425 | F   | 49  | 1.413 |
| ST0432 | F   | 49  | 1.301 |
| ST0250 | M   | 40  | 1.602 |
| ST0382 | M   | 40  | 1.386 |
| ST0036 | M   | 41  | 1.424 |
| ST0256 | M   | 41  | 1.647 |
| ST0405 | M   | 41  | 1.53  |
| ST0037 | M   | 42  | 1.454 |
| ST0164 | M   | 45  | 1.043 |
| ST0394 | M   | 45  | 2.052 |
| ST0395 | M   | 47  | 1.73  |
| ST0303 | M   | 49  | 1.406 |
| ST0580 | F   | 49  | 1.643 |
| ST0500 | M   | 42  | 1.787 |
| ST0496 | F   | 45  | 1.911 |
| ST0437 | F   | 43  | 1.831 |
| ST0449 | F   | 41  | 1.889 |
| ST0490 | M   | 40  | 1.768 |
| ST0522 | M   | 40  | 0.817 |
| ST0511 | M   | 46  | 1.823 |
| ST0452 | M   | 43  | 1.888 |
| ST0434 | M   | 49  | 1.045 |
| ST0273 | F   | 43  | 1.33  |

| CODE   | M/F | AGE | OD    |
|--------|-----|-----|-------|
| ST0032 | F   | 51  | 1.577 |
| ST0162 | F   | 51  | 1.216 |
| ST0031 | F   | 53  | 1.759 |
| ST0058 | F   | 53  | 1.617 |
| ST0232 | F   | 55  | 1.523 |
| ST0314 | F   | 55  | 1.724 |
| ST0236 | F   | 56  | 1.821 |
| ST0060 | F   | 58  | 1.483 |
| ST0407 | F   | 58  | 1.7   |
| ST0372 | F   | 59  | 1.773 |
| ST0292 | F   | 60  | 1.574 |
| ST0412 | F   | 60  | 1.511 |
| ST0258 | M   | 50  | 1.86  |
| ST0375 | M   | 50  | 1.563 |
| ST0200 | M   | 51  | 1.684 |
| ST0139 | M   | 54  | 1.842 |
| ST0255 | M   | 54  | 1.726 |
| ST0351 | M   | 55  | 1.371 |
| ST0271 | M   | 56  | 1.757 |
| ST0061 | M   | 57  | 1.439 |
| ST0350 | M   | 57  | 1.625 |
| ST0055 | M   | 59  | 1.743 |
| ST0064 | M   | 59  | 1.09  |
| ST0260 | M   | 59  | 1.897 |
| ST0293 | M   | 59  | 1.377 |
| ST0323 | M   | 60  | 1.804 |
| ST0341 | M   | 60  | 1.38  |
| ST0426 | M   | 60  | 1.789 |
| ST0555 | M   | 53  | 2.007 |
| ST0517 | F   | 54  | 2.017 |
| ST0504 | F   | 53  | 1.987 |
| ST0443 | F   | 55  | 1.535 |
| ST0483 | F   | 56  | 1.242 |
| ST0472 | F   | 58  | 1.774 |
| ST0248 | F   | 59  | 1.212 |
| ST0260 | M   | 59  | 1.945 |
| ST0270 | F   | 59  | 1.558 |

| CODE   | M/F | AGE | OD    |
|--------|-----|-----|-------|
| ST0816 | F   | 1   | 0.148 |
| ST0820 | F   | 1   | 0.139 |
| ST1166 | F   | 1   | 0.577 |
| ST1280 | F   | 1   | 0.723 |
| ST0861 | F   | 3   | 0.166 |
| ST1236 | F   | 3   | 0.049 |
| ST1277 | F   | 3   | 1.307 |
| ST1289 | F   | 3   | 0.099 |
| ST1145 | F   | 4   | 2.044 |
| ST1203 | F   | 5   | 0.173 |
| ST1284 | F   | 6   | 0.071 |
| ST1186 | F   | 7   | 0.832 |
| ST1159 | F   | 8   | 0.111 |
| ST1248 | F   | 8   | 0.557 |
| ST1122 | F   | 9   | 1.114 |
| ST1129 | F   | 9   | 1.708 |
| ST0827 | M   | 1   | 0.057 |
| ST0899 | M   | 1   | 0.356 |
| ST1163 | M   | 1   | 0.152 |
| ST1294 | M   | 1   | 0.451 |
| ST1295 | M   | 1   | 0.291 |
| ST0843 | M   | 2   | 0.139 |
| ST1164 | M   | 2   | 0.128 |
| ST1197 | M   | 2   | 0.154 |
| ST1282 | M   | 2   | 0.042 |
| ST1288 | M   | 2   | 0.057 |
| ST1296 | M   | 2   | 1.153 |
| ST0805 | M   | 3   | 0.256 |
| ST0812 | M   | 4   | 0.085 |
| ST1244 | M   | 4   | 0.061 |
| ST0859 | M   | 6   | 0.059 |
| ST1292 | M   | 6   | 0.057 |
| ST0878 | M   | 8   | 0.111 |
| ST1246 | M   | 8   | 0.123 |
| ST0801 | M   | 4   | 0.161 |
| ST0850 | M   | 0   | 0.198 |
| ST1142 | F   | 2   | 0.148 |
| ST1177 | F   | 3   | 0.202 |

| CODE   | M/F | AGE | OD    |
|--------|-----|-----|-------|
| ST0837 | F   | 10  | 0.699 |
| ST0858 | M   | 10  | 0.083 |
| ST0955 | M   | 10  | 1.352 |
| ST1208 | F   | 10  | 0.215 |
| ST1245 | F   | 10  | 1.485 |
| ST1265 | F   | 10  | 1.16  |
| ST1278 | F   | 10  | 0.093 |
| ST1119 | M   | 11  | 0.233 |
| ST1160 | F   | 11  | 0.466 |
| ST1207 | M   | 11  | 1.979 |
| ST1215 | M   | 11  | 0.114 |
| ST1218 | F   | 11  | 1.795 |
| ST1238 | F   | 11  | 1.191 |
| ST1240 | F   | 11  | 0.141 |
| ST1251 | F   | 11  | 1.406 |
| ST0886 | F   | 12  | 0.324 |
| ST1216 | M   | 12  | 1.276 |
| ST1258 | M   | 12  | 0.657 |
| ST1271 | M   | 12  | 0.056 |
| ST1299 | M   | 12  | 0.066 |
| ST1120 | M   | 13  | 1.572 |
| ST1175 | M   | 13  | 0.264 |
| ST1210 | F   | 13  | 1.322 |
| ST1283 | F   | 13  | 0.715 |
| ST1183 | F   | 14  | 2.025 |
| ST1213 | F   | 14  | 1.65  |
| ST1234 | M   | 14  | 0.155 |
| ST1253 | M   | 14  | 0.053 |
| ST1255 | M   | 14  | 0.215 |
| ST1259 | M   | 14  | 0.047 |
| ST1261 | M   | 14  | 0.315 |
| ST1262 | M   | 14  | 1.11  |
| ST1269 | F   | 14  | 1.581 |
| ST1290 | F   | 15  | 1.835 |
| ST1266 | M   | 12  | 0.114 |
| ST0909 | F   | 17  | 1.032 |
| ST0975 | F   | 17  | 1.478 |
| ST0992 | F   | 16  | 0.077 |

| CODE   | M/F | AGE | OD    |
|--------|-----|-----|-------|
| ST1404 | F   | 22  | 1.729 |
| ST1016 | F   | 25  | 0.291 |
| ST0937 | F   | 26  | 1.938 |
| ST0944 | F   | 26  | 1.483 |
| ST1199 | F   | 26  | 1.64  |
| ST0946 | F   | 27  | 1.225 |
| ST1468 | F   | 27  | 1.617 |
| ST1421 | F   | 28  | 1.074 |
| ST1355 | F   | 29  | 0.893 |
| ST1484 | F   | 29  | 1.785 |
| ST0751 | M   | 21  | 1.994 |
| ST1104 | M   | 25  | 1.199 |

| CODE   | M/F | AGE | OD    |
|--------|-----|-----|-------|
| ST1390 | F   | 32  | 1.331 |
| ST1040 | F   | 33  | 1.938 |
| ST1095 | F   | 33  | 1.711 |
| ST1348 | F   | 33  | 1.737 |
| ST1370 | F   | 33  | 0.055 |
| ST0763 | F   | 35  | 1.966 |
| ST0769 | F   | 35  | 1.769 |
| ST1061 | F   | 35  | 1.473 |
| ST1088 | F   | 35  | 1.567 |
| ST1198 | F   | 35  | 1.734 |
| ST1362 | F   | 36  | 0.597 |
| ST1400 | F   | 36  | 1.343 |
| ST1419 | F   | 36  | 1.6   |
| ST1467 | F   | 36  | 1.549 |
| ST1315 | F   | 37  | 1.416 |
| ST1394 | F   | 37  | 1.848 |
| ST1406 | F   | 37  | 1.558 |
| ST0787 | F   | 38  | 0.954 |
| ST1350 | F   | 38  | 1.426 |
| ST1398 | F   | 38  | 1.796 |
| ST1435 | F   | 38  | 1.655 |
| ST1034 | F   | 39  | 1.868 |
| ST1347 | F   | 39  | 1.577 |
| ST1415 | F   | 39  | 1.551 |
| ST1473 | F   | 39  | 1.176 |
| ST1077 | M   | 30  | 1.483 |
| ST1321 | M   | 30  | 1.543 |
| ST1032 | M   | 34  | 0.498 |
| ST0988 | M   | 36  | 1.158 |
| ST1008 | M   | 37  | 1.884 |
| ST1311 | M   | 37  | 1.878 |
| ST1336 | M   | 38  | 1.233 |
| ST1041 | M   | 39  | 1.716 |
| ST1356 | F   | 35  | 1.997 |
| ST1372 | F   | 39  | 1.716 |
| ST1027 | F   | 34  | 1.777 |

| CODE   | M/F | AGE | OD    |
|--------|-----|-----|-------|
| ST1055 | F   | 40  | 1.794 |
| ST1070 | F   | 40  | 1.461 |
| ST1352 | F   | 40  | 1.126 |
| ST1420 | F   | 40  | 1.411 |
| ST0941 | F   | 41  | 1.665 |
| ST1457 | F   | 41  | 1.718 |
| ST1476 | F   | 41  | 1.837 |
| ST1301 | F   | 43  | 1.04  |
| ST1395 | F   | 43  | 1.25  |
| ST1083 | F   | 44  | 1.71  |
| ST0948 | F   | 45  | 1.413 |
| ST1059 | F   | 45  | 1.392 |
| ST1076 | F   | 45  | 1.847 |
| ST1318 | F   | 45  | 1.784 |
| ST1343 | F   | 45  | 1.192 |
| ST1442 | F   | 48  | 1.79  |
| ST1408 | F   | 49  | 0.923 |
| ST1056 | M   | 40  | 1.363 |
| ST1365 | M   | 40  | 1.352 |
| ST0752 | M   | 41  | 1.799 |
| ST1049 | M   | 41  | 1.89  |
| ST1057 | M   | 43  | 1.528 |
| ST1310 | M   | 43  | 1.758 |
| ST1021 | M   | 46  | 1.66  |
| ST1072 | M   | 46  | 1.821 |
| ST1319 | M   | 46  | 1.64  |
| ST1333 | M   | 46  | 1.66  |
| ST1443 | M   | 46  | 1.863 |
| ST1030 | M   | 47  | 1.672 |
| ST1323 | M   | 47  | 1.327 |
| ST1460 | M   | 47  | 0.966 |
| ST1320 | M   | 48  | 1.5   |
| ST0800 | M   | 49  | 0.936 |
| ST1458 | M   | 49  | 1.371 |
| ST1069 | M   | 46  | 0.983 |
| ST1424 | F   | 46  | 1.913 |
| ST1324 | M   | 45  | 1.747 |
| ST1330 | F   | 40  | 1.27  |

| CODE   | M/F | AGE | OD    |
|--------|-----|-----|-------|
| ST1098 | F   | 50  | 1.945 |
| ST1375 | F   | 50  | 1.894 |
| ST1393 | F   | 51  | 1.489 |
| ST1455 | F   | 51  | 1.722 |
| ST1465 | F   | 51  | 1.705 |
| ST0766 | F   | 52  | 1.372 |
| ST1475 | F   | 53  | 1.382 |
| ST0788 | F   | 54  | 1.692 |
| ST1383 | F   | 54  | 1.642 |
| ST0791 | F   | 55  | 1.383 |
| ST1003 | F   | 55  | 0.994 |
| ST1470 | F   | 55  | 1.581 |
| ST1002 | F   | 56  | 1.747 |
| ST1367 | F   | 56  | 1.688 |
| ST1477 | F   | 57  | 0.867 |
| ST0789 | F   | 58  | 1.884 |
| ST1464 | F   | 59  | 1.128 |
| ST1342 | M   | 51  | 1.717 |
| ST1399 | M   | 51  | 1.667 |
| ST1036 | M   | 52  | 1.478 |
| ST1012 | M   | 53  | 1.715 |
| ST1029 | M   | 53  | 1.991 |
| ST1091 | M   | 53  | 1.918 |
| ST1019 | M   | 54  | 1.336 |
| ST1004 | M   | 54  | 1.172 |
| ST1099 | M   | 54  | 1.878 |
| ST1100 | M   | 55  | 1.323 |
| ST1454 | M   | 55  | 1.708 |
| ST1052 | M   | 56  | 1.009 |
| ST1335 | M   | 57  | 1.645 |
| ST1413 | M   | 57  | 1.753 |
| ST1001 | M   | 58  | 1.741 |
| ST1007 | M   | 58  | 1.774 |
| ST1344 | M   | 58  | 1.709 |
| ST0762 | F   | 51  | 1.662 |
| ST0775 | M   | 56  | 1.247 |
| ST0795 | F   | 58  | 1.666 |
| ST1466 | M   | 50  | 1.8   |

| CODE   | M/F | AGE | OD    |
|--------|-----|-----|-------|
| LP0057 | M   | 1   | 0.31  |
| LP0186 | M   | 1   | 0.188 |
| LP0297 | M   | 3   | 1.145 |
| LP0020 | M   | 4   | 0.166 |
| LP0526 | M   | 4   | 1.858 |
| LP0573 | M   | 4   | 0.104 |
| LP0622 | M   | 4   | 0.101 |
| LP0137 | M   | 5   | 0.088 |
| LP0157 | M   | 5   | 0.202 |
| LP0212 | M   | 5   | 0.084 |
| LP0150 | M   | 6   | 1.657 |
| LP0181 | M   | 6   | 1.29  |
| LP0205 | M   | 6   | 0.08  |
| LP0332 | M   | 6   | 0.068 |
| LP0677 | M   | 7   | 0.092 |
| LP0702 | M   | 7   | 0.115 |
| LP0101 | M   | 8   | 0.134 |
| LP0176 | M   | 8   | 0.134 |
| LP0151 | M   | 9   | 0.126 |
| LP0122 | F   | 1   | 0.362 |
| LP0133 | F   | 1   | 0.864 |
| LP0210 | F   | 1   | 0.156 |
| LP0413 | F   | 1   | 0.156 |
| LP0479 | F   | 1   | 0.495 |
| LP0048 | F   | 2   | 1.369 |
| LP0132 | F   | 2   | 0.557 |
| LP0480 | F   | 2   | 0.09  |
| LP0138 | F   | 3   | 0.438 |
| LP0232 | F   | 4   | 1.756 |
| LP0527 | F   | 4   | 0.05  |
| LP0740 | F   | 5   | 0.189 |
| LP0079 | F   | 6   | 1.53  |
| LP0463 | F   | 6   | 0.115 |
| LP0665 | F   | 6   | 0.08  |
| LP0725 | F   | 7   | 0.934 |
| LP0747 | F   | 7   | 1.011 |
| LP0162 | F   | 8   | 0.067 |
| LP0355 | F   | 9   | 0.722 |

| CODE   | M/F | AGE | OD    |
|--------|-----|-----|-------|
| LP0222 | F   | 10  | 0.781 |
| LP0171 | M   | 12  | 0.083 |
| LP0165 | M   | 13  | 1.156 |
| LP0257 | M   | 13  | 0.205 |
| LP0400 | M   | 13  | 0.856 |
| LP0149 | M   | 14  | 0.29  |
| LP0535 | M   | 14  | 1.434 |
| LP0671 | M   | 15  | 1.464 |
| LP0703 | M   | 15  | 1.46  |
| LP0017 | M   | 16  | 1.368 |
| LP0005 | M   | 17  | 1.385 |
| LP0378 | M   | 17  | 0.816 |
| LP0746 | M   | 17  | 1.828 |
| LP0752 | M   | 17  | 0.369 |
| LP0487 | M   | 18  | 1.018 |
| LP0570 | M   | 18  | 0.05  |
| LP0672 | M   | 19  | 1.551 |
| LP0511 | F   | 10  | 0.832 |
| LP0099 | F   | 11  | 0.09  |
| LP0054 | F   | 12  | 0.74  |
| LP0627 | F   | 12  | 0.373 |
| LP0050 | F   | 14  | 0.08  |
| LP0472 | F   | 14  | 1.746 |
| LP0510 | F   | 14  | 0.887 |
| LP0537 | F   | 14  | 0.327 |
| LP0408 | F   | 16  | 1.308 |
| LP0586 | F   | 17  | 1.323 |
| LP0612 | F   | 17  | 1.672 |
| LP0684 | F   | 17  | 2.168 |
| LP0574 | F   | 18  | 1.715 |
| LP0602 | F   | 18  | 0.265 |
| LP0751 | F   | 18  | 1.731 |
| LP0522 | F   | 19  | 1.994 |
| LP0328 | F   | 11  | 0.935 |

| CODE   | M/F | AGE | OD    |
|--------|-----|-----|-------|
| LP0121 | M   | 20  | 1.78  |
| LP0338 | M   | 20  | 1.519 |
| LP0730 | M   | 20  | 0.846 |
| LP0688 | M   | 21  | 2.026 |
| LP0732 | M   | 21  | 1.556 |
| LP0019 | M   | 22  | 1.612 |
| LP0411 | M   | 22  | 0.911 |
| LP0555 | M   | 22  | 1.358 |
| LP0695 | M   | 25  | 1.926 |
| LP0715 | M   | 27  | 1.198 |
| LP0711 | M   | 28  | 1.374 |
| LP0728 | M   | 28  | 1.386 |
| LP0717 | M   | 29  | 1.783 |
| LP0260 | F   | 20  | 1.588 |
| LP0379 | F   | 20  | 0.623 |
| LP0629 | F   | 20  | 0.266 |
| LP0096 | F   | 22  | 0.907 |
| LP0219 | F   | 22  | 1.608 |
| LP0541 | F   | 22  | 1.665 |
| LP0217 | F   | 24  | 0.077 |
| LP0638 | F   | 24  | 2.266 |
| LP0218 | F   | 25  | 0.94  |
| LP0370 | F   | 25  | 1.317 |
| LP0427 | F   | 25  | 0.631 |
| LP0613 | F   | 25  | 1.839 |
| LP0615 | F   | 27  | 2.041 |
| LP0513 | F   | 28  | 2.063 |
| LP0568 | F   | 29  | 1.669 |
| LP0285 | M   | 23  | 0.707 |
| LP0407 | M   | 24  | 2.096 |
| LP0261 | M   | 26  | 1.757 |
| LP0262 | F   | 26  | 1.787 |
| LP0607 | M   | 27  | 1.632 |
| LP0249 | M   | 29  | 0.905 |

| CODE   | M/F | AGE | OD    |
|--------|-----|-----|-------|
| LP0041 | M   | 30  | 1.523 |
| LP0437 | M   | 30  | 1.829 |
| LP0547 | M   | 30  | 1.432 |
| LP0422 | M   | 31  | 1.319 |
| LP0680 | M   | 31  | 1.754 |
| LP0674 | M   | 32  | 1.907 |
| LP0394 | M   | 33  | 1.293 |
| LP0528 | M   | 33  | 1.944 |
| LP0736 | M   | 33  | 1.318 |
| LP0595 | M   | 34  | 1.919 |
| LP0606 | M   | 34  | 1.86  |
| LP0714 | M   | 34  | 1.755 |
| LP0741 | M   | 35  | 1.538 |
| LP0753 | M   | 35  | 1.773 |
| LP0387 | M   | 37  | 1.627 |
| LP0667 | M   | 37  | 1.742 |
| LP0669 | M   | 37  | 1.575 |
| LP0294 | M   | 38  | 1.147 |
| LP0478 | M   | 38  | 0.929 |
| LP0682 | M   | 38  | 1.061 |
| LP0689 | M   | 38  | 1.821 |
| LP0633 | F   | 30  | 2.018 |
| LP0039 | F   | 31  | 1.86  |
| LP0388 | F   | 31  | 1.285 |
| LP0512 | F   | 31  | 1.656 |
| LP0267 | F   | 32  | 1.44  |
| LP0225 | F   | 33  | 1.591 |
| LP0242 | F   | 34  | 1.678 |
| LP0291 | F   | 34  | 0.352 |
| LP0072 | F   | 35  | 1.599 |
| LP0252 | F   | 35  | 1.484 |
| LP0519 | F   | 35  | 2.113 |
| LP0538 | F   | 35  | 1.99  |
| LP0418 | F   | 36  | 1.281 |
| LP0539 | F   | 37  | 1.414 |
| LP0066 | F   | 38  | 1.834 |
| LP0226 | F   | 39  | 1.822 |
| LP0268 | F   | 39  | 1.25  |
| LP0430 | F   | 39  | 1.36  |

| CODE   | M/F | AGE | OD    |
|--------|-----|-----|-------|
| LP0001 | M   | 40  | 1.7   |
| LP0721 | M   | 40  | 1.648 |
| LP0271 | M   | 41  | 1.758 |
| LP0030 | M   | 43  | 1.771 |
| LP0317 | M   | 43  | 1.553 |
| LP0351 | M   | 43  | 1.373 |
| LP0420 | M   | 43  | 1.971 |
| LP0476 | M   | 43  | 1.599 |
| LP0559 | M   | 43  | 1.374 |
| LP0655 | M   | 43  | 1.78  |
| LP0600 | M   | 45  | 1.117 |
| LP0061 | M   | 46  | 1.685 |
| LP0286 | M   | 47  | 0.806 |
| LP0368 | M   | 47  | 1.731 |
| LP0654 | M   | 47  | 1.073 |
| LP0565 | M   | 49  | 1.741 |
| LP0436 | F   | 40  | 1.078 |
| LP0520 | F   | 40  | 1.349 |
| LP0660 | F   | 41  | 0.841 |
| LP0112 | F   | 45  | 1.75  |
| LP0250 | F   | 45  | 1.717 |
| LP0455 | F   | 45  | 0.828 |
| LP0287 | F   | 46  | 1.188 |
| LP0348 | F   | 46  | 1.78  |
| LP0111 | F   | 47  | 1.731 |
| LP0554 | F   | 47  | 2.11  |
| LP0009 | F   | 48  | 1.645 |
| LP0107 | F   | 48  | 1.749 |
| LP0253 | F   | 48  | 1.322 |
| LP0277 | F   | 49  | 1.657 |
| LP0357 | F   | 49  | 0.971 |
| LP0453 | F   | 49  | 0.771 |
| LP0718 | M   | 48  | 1.701 |
| LP0093 | F   | 42  | 1.768 |

| CODE   | M/F | AGE | OD    |
|--------|-----|-----|-------|
| LP0319 | F   | 50  | 1.641 |
| LP0428 | M   | 50  | 1.785 |
| LP0315 | M   | 52  | 1.013 |
| LP0007 | M   | 54  | 1.574 |
| LP0431 | M   | 54  | 1.323 |
| LP0681 | M   | 54  | 1.714 |
| LP0450 | M   | 55  | 1.474 |
| LP0552 | M   | 55  | 2.033 |
| LP0679 | M   | 55  | 0.702 |
| LP0469 | M   | 56  | 1.448 |
| LP0524 | M   | 56  | 1.849 |
| LP0623 | M   | 56  | 1.992 |
| LP0405 | M   | 57  | 1.263 |
| LP0460 | M   | 57  | 1.683 |
| LP0775 | M   | 57  | 0.445 |
| LP0763 | M   | 58  | 1.181 |
| LP0244 | M   | 59  | 1.812 |
| LP0404 | M   | 59  | 0.775 |
| LP0777 | M   | 59  | 0.937 |
| LP0543 | F   | 50  | 1.97  |
| LP0010 | F   | 51  | 0.702 |
| LP0228 | F   | 51  | 1.608 |
| LP0071 | F   | 52  | 1.259 |
| LP0441 | F   | 52  | 1.883 |
| LP0675 | F   | 52  | 1.176 |
| LP0458 | F   | 53  | 1.32  |
| LP0620 | F   | 53  | 1.652 |
| LP0278 | F   | 54  | 1.401 |
| LP0325 | F   | 55  | 1.804 |
| LP0215 | F   | 56  | 1.585 |
| LP0762 | F   | 56  | 1.196 |
| LP0772 | F   | 56  | 1.491 |
| LP0307 | F   | 58  | 1.434 |
| LP0769 | F   | 58  | 1.235 |

| CODE   | M/F | AGE | OD    |
|--------|-----|-----|-------|
| AY0118 | M   | 3   | 0.077 |
| AY0132 | M   | 4   | 0.254 |
| AY0143 | M   | 4   | 1.515 |
| AY0079 | M   | 5   | 0.279 |
| AY0109 | M   | 5   | 0.841 |
| AY0123 | M   | 5   | 0.407 |
| AY0155 | M   | 5   | 0.063 |
| AY0077 | M   | 6   | 0.101 |
| AY0145 | M   | 6   | 0.982 |
| AY0160 | M   | 6   | 0.144 |
| AY0161 | M   | 6   | 0.414 |
| AY0215 | M   | 7   | 0.875 |
| AY0187 | M   | 8   | 0.067 |
| AY0196 | M   | 8   | 0.053 |
| AY0211 | M   | 8   | 0.056 |
| AY0251 | M   | 9   | 0.951 |
| AY0252 | M   | 9   | 0.654 |
| AY0073 | F   | 3   | 0.114 |
| AY0097 | F   | 3   | 0.083 |
| AY0106 | F   | 3   | 0.08  |
| AY0107 | F   | 4   | 1.376 |
| AY0111 | F   | 4   | 0.155 |
| AY0135 | F   | 4   | 0.113 |
| AY0103 | F   | 5   | 0.169 |
| AY0119 | F   | 5   | 0.06  |
| AY0153 | F   | 5   | 0.094 |
| AY0074 | F   | 6   | 0.65  |
| AY0142 | F   | 6   | 0.082 |
| AY0157 | F   | 6   | 0.626 |
| AY0185 | F   | 7   | 0.102 |
| AY0205 | F   | 7   | 1.025 |
| AY0210 | F   | 8   | 0.084 |
| AY0232 | F   | 9   | 0.209 |
| AY0240 | F   | 9   | 0.213 |

| CODE   | M/F | AGE | OD    |
|--------|-----|-----|-------|
| AY0235 | M   | 10  | 0.074 |
| AY0241 | M   | 10  | 0.071 |
| AY0248 | M   | 10  | 0.062 |
| AY0253 | M   | 10  | 1.032 |
| AY0257 | M   | 10  | 0.851 |
| AY0262 | M   | 10  | 1.431 |
| AY0263 | M   | 10  | 0.049 |
| AY0269 | M   | 10  | 0.056 |
| AY0415 | M   | 12  | 1.54  |
| AY0416 | M   | 13  | 0.7   |
| AY0398 | M   | 14  | 0.389 |
| AY0400 | M   | 14  | 0.991 |
| AY0394 | M   | 17  | 0.064 |
| AY0389 | M   | 18  | 1.062 |
| AY0427 | M   | 18  | 1.357 |
| AY0610 | M   | 15  | 0.838 |
| AY0611 | M   | 15  | 0.09  |
| AY0230 | F   | 10  | 0.084 |
| AY0233 | F   | 10  | 0.066 |
| AY0244 | F   | 10  | 1.11  |
| AY0246 | F   | 10  | 1.437 |
| AY0249 | F   | 10  | 0.057 |
| AY0250 | F   | 10  | 0.048 |
| AY0255 | F   | 10  | 1.208 |
| AY0259 | F   | 10  | 0.084 |
| AY0411 | F   | 12  | 0.849 |
| AY0413 | F   | 12  | 1.729 |
| AY0417 | F   | 14  | 1.696 |
| AY0395 | F   | 15  | 0.109 |
| AY0579 | F   | 16  | 1.757 |
| AY0373 | F   | 17  | 0.049 |
| AY0382 | F   | 17  | 0.884 |
| AY0425 | F   | 17  | 1.211 |
| AY0580 | F   | 16  | 1.879 |
| AY0248 | M   | 10  | 0.062 |
| AY0249 | F   | 10  | 0.067 |
| AY0740 | M   | 19  | 1.852 |
| AY0741 | M   | 12  | 0.977 |

| CODE   | M/F | AGE | OD    |
|--------|-----|-----|-------|
| AY0447 | M   | 21  | 1.701 |
| AY0448 | M   | 21  | 0.973 |
| AY0446 | M   | 24  | 1.069 |
| AY0376 | M   | 27  | 0.958 |
| AY0281 | M   | 20  | 1.739 |
| AY0296 | M   | 20  | 0.076 |
| AY0431 | M   | 20  | 0.049 |
| AY0554 | M   | 21  | 1.693 |
| AY0573 | M   | 24  | 0.177 |
| AY0574 | M   | 27  | 0.929 |
| AY0576 | M   | 27  | 1.373 |
| AY0279 | M   | 29  | 1.425 |
| AY0449 | M   | 29  | 1.238 |
| AY0756 | M   | 21  | 1.575 |
| AY0629 | M   | 22  | 1.846 |
| AY0650 | M   | 24  | 1.294 |
| AY0633 | M   | 27  | 1.766 |
| AY0387 | F   | 20  | 0.112 |
| AY0432 | F   | 20  | 1.609 |
| AY0444 | F   | 21  | 1.419 |
| AY0392 | F   | 23  | 1.94  |
| AY0443 | F   | 23  | 1.126 |
| AY0445 | F   | 23  | 1.073 |
| AY0577 | F   | 23  | 1.671 |
| AY0442 | F   | 24  | 0.768 |
| AY0390 | F   | 28  | 0.125 |
| AY0380 | F   | 29  | 0.473 |
| AY0347 | F   | 23  | 1.43  |
| AY0511 | F   | 23  | 1.156 |
| AY0287 | F   | 24  | 1.745 |
| AY0560 | F   | 28  | 1.743 |
| AY0736 | F   | 21  | 0.388 |
| AY0758 | F   | 23  | 1.985 |
| AY0628 | F   | 27  | 1.733 |
| AY0737 | M   | 29  | 1.713 |
| AY0744 | M   | 24  | 0.168 |

| CODE   | M/F | AGE | OD    |
|--------|-----|-----|-------|
| AY0458 | M   | 32  | 1.549 |
| AY0450 | M   | 32  | 1.474 |
| AY0454 | M   | 33  | 1.47  |
| AY0529 | M   | 35  | 1.355 |
| AY0330 | M   | 36  | 1.49  |
| AY0456 | M   | 36  | 1.546 |
| AY0495 | M   | 36  | 1.544 |
| AY0307 | M   | 39  | 1.361 |
| AY0747 | M   | 30  | 1.203 |
| AY0645 | M   | 33  | 1.648 |
| AY0641 | M   | 34  | 1.582 |
| AY0648 | M   | 34  | 1.628 |
| AY0724 | M   | 35  | 1.154 |
| AY0691 | M   | 36  | 1.457 |
| AY0723 | M   | 36  | 1.805 |
| AY0742 | M   | 36  | 1.489 |
| AY0738 | M   | 38  | 1.856 |
| AY0550 | F   | 30  | 1.329 |
| AY0393 | F   | 32  | 1.145 |
| AY0397 | F   | 32  | 1.469 |
| AY0375 | F   | 33  | 1.343 |
| AY0391 | F   | 33  | 1.229 |
| AY0381 | F   | 34  | 1.471 |
| AY0378 | F   | 35  | 1.558 |
| AY0396 | F   | 35  | 0.942 |
| AY0459 | F   | 35  | 1.477 |
| AY0379 | F   | 36  | 1.433 |
| AY0372 | F   | 37  | 1.486 |
| AY0388 | F   | 37  | 1.531 |
| AY0402 | F   | 36  | 1.243 |
| AY0359 | F   | 37  | 1.431 |
| AY0541 | F   | 37  | 1.557 |
| AY0365 | F   | 39  | 1.47  |
| AY0642 | F   | 38  | 1.038 |
| AY0709 | F   | 35  | 1.773 |
| AY0714 | F   | 31  | 1.899 |

| CODE   | M/F | AGE | OD    |
|--------|-----|-----|-------|
| AY0530 | M   | 43  | 1.556 |
| AY0318 | M   | 44  | 0.889 |
| AY0462 | M   | 46  | 1.747 |
| AY0467 | M   | 46  | 1.642 |
| AY0501 | M   | 46  | 0.781 |
| AY0297 | M   | 47  | 1.019 |
| AY0472 | M   | 47  | 1.651 |
| AY0315 | M   | 48  | 1.598 |
| AY0280 | M   | 49  | 1.401 |
| AY0745 | M   | 40  | 1.593 |
| AY0746 | M   | 40  | 1.782 |
| AY0722 | M   | 41  | 1.422 |
| AY0586 | M   | 42  | 1.286 |
| AY0698 | M   | 44  | 1.821 |
| AY0730 | M   | 44  | 1.538 |
| AY0584 | M   | 47  | 1.268 |
| AY0732 | M   | 47  | 1.792 |
| AY0377 | F   | 43  | 1.747 |
| AY0512 | F   | 40  | 1.326 |
| AY0271 | F   | 41  | 1.54  |
| AY0368 | F   | 41  | 1.109 |
| AY0403 | F   | 41  | 1.202 |
| AY0545 | F   | 42  | 1.464 |
| AY0538 | F   | 43  | 1.246 |
| AY0313 | F   | 44  | 1.911 |
| AY0340 | F   | 44  | 1.515 |
| AY0301 | F   | 46  | 1.466 |
| AY0344 | F   | 47  | 1.641 |
| AY0321 | F   | 48  | 1.703 |
| AY0461 | F   | 48  | 1.733 |
| AY0564 | F   | 48  | 1.634 |
| AY0473 | F   | 49  | 1.386 |
| AY0690 | F   | 46  | 0.793 |
| AY0585 | F   | 49  | 1.491 |
| AY0557 | M   | 49  | 1.956 |
| AY0684 | F   | 46  | 0.799 |

| CODE   | M/F | AGE | OD    |
|--------|-----|-----|-------|
| AY0294 | M   | 50  | 1.137 |
| AY0331 | M   | 50  | 1.716 |
| AY0470 | M   | 50  | 1.292 |
| AY0471 | M   | 50  | 1.409 |
| AY0552 | M   | 50  | 1.143 |
| AY0549 | M   | 51  | 0.328 |
| AY0273 | M   | 55  | 1.663 |
| AY0303 | M   | 57  | 1.413 |
| AY0591 | M   | 50  | 0.801 |
| AY0696 | M   | 50  | 1.914 |
| AY0735 | M   | 50  | 1.942 |
| AY0654 | M   | 52  | 1.521 |
| AY0660 | M   | 52  | 1.592 |
| AY0666 | M   | 54  | 1.693 |
| AY0672 | M   | 56  | 1.475 |
| AY0658 | M   | 57  | 1.686 |
| AY0668 | M   | 57  | 1.862 |
| AY0385 | F   | 50  | 1.53  |
| AY0490 | F   | 51  | 1.02  |
| AY0487 | F   | 52  | 1.434 |
| AY0489 | F   | 52  | 1.749 |
| AY0386 | F   | 53  | 1.426 |
| AY0374 | F   | 59  | 1.356 |
| AY0486 | F   | 59  | 1.608 |
| AY0488 | F   | 59  | 1.289 |
| AY0384 | F   | 51  | 1.321 |
| AY0326 | F   | 57  | 1.407 |
| AY0524 | F   | 57  | 1.373 |
| AY0478 | F   | 58  | 1.741 |
| AY0675 | F   | 52  | 1.17  |
| AY0662 | F   | 54  | 1.474 |
| AY0685 | F   | 55  | 1.68  |
| AY0665 | F   | 57  | 0.723 |
| AY0725 | F   | 57  | 1.437 |
| AY0718 | F   | 52  | 1.761 |
| AY0728 | F   | 55  | 1.3   |
